# Supplementary material for: Three-dimensional automated reporter quantification (3D-ARQ) technology enables quantitative screening in retinal organoids
Source: Oxford University Press journal article supplement (doi:10.1242/dev.146290), 2017-09-05
Supplement: dev146290supp.pdf [file dev146290supp.pdf]

**Table S1. Recommended microplate reader parameters**

| Parameter    | Optimized settings     | Reason                                                                                                                                                                                                                           |
|--------------|------------------------|----------------------------------------------------------------------------------------------------------------------------------------------------------------------------------------------------------------------------------|
| Plate type   | Greiner 96 well, black | Black plates reduce background and fluorescence crosstalk, improves sensitivity.<br>( $Z'=0.19$ for black U-bottom vs. $Z'=0.00$ for clear U-bottom plates)                                                                      |
| Well shape   | V-bottom               | Retinal organoids naturally self-center. Simplifies fluorescent plate reads.<br>( $Z'=0.33$ for black V-bottom vs. $Z'=0.19$ for black U-bottom plates)                                                                          |
| Read mode    | Top read               | Allows Z-dimensional focus and the use of black v-bottom plates.                                                                                                                                                                 |
| Volume       | 340 $\mu$ l            | Fills well completely, no meniscus.                                                                                                                                                                                              |
| Flash mode   | 1 (400 Hz)             | A high flash mode increases sensitivity. However if sample viability were a concern (especially if using lower media volumes), a lower flash mode (100 Hz) can be used instead. ( $Z'=0.33$ for 400Hz vs. $Z'=0.32$ for 100 Hz). |
| # of flashes | 20                     | Lower flash numbers increase speed (throughput). Higher flash numbers improve accuracy. (See Table S2)                                                                                                                           |

Assay parameters were determined by scanning transgenic GFP-expressing retinal organoids and wild type controls (n=6/condition).

**Table S2. Estimated throughput performance**

| # of flashes             | 2       | 5       | 10      | 20      | 50      |                              |
|--------------------------|---------|---------|---------|---------|---------|------------------------------|
| Scan time per well       | 0.1875  | 0.1979  | 0.2187  | 0.2395  | 0.3229  | sec                          |
| Scan time per plate      | 18      | 19      | 21      | 23      | 31      | sec                          |
| Estimated daily capacity | 2,618   | 2,541   | 2,400   | 2,273   | 1,878   | plates                       |
| Estimated daily capacity | 251,345 | 243,952 | 230,400 | 218,273 | 180,313 | Individual retinal organoids |
| SSMD*                    | >> 2    | >> 2    | >> 2    | >> 2    | >> 2    |                              |
| Z' factor (for n=6)      | 0.30    | 0.31    | 0.32    | 0.33    | 0.33    |                              |

Estimated daily capacity was calculated adding 15 seconds per 96 well plate to account for handling time between plates. SSMD\*: robust SSMD (strictly standardized mean difference).

**Table S3. Analytic metrics for evaluating assay quality**

| Parameter                  | Formula                                                                                   | Interpretation                                                                                                                                 | HTS compatible values                                                                                                                                                        |
|----------------------------|-------------------------------------------------------------------------------------------|------------------------------------------------------------------------------------------------------------------------------------------------|------------------------------------------------------------------------------------------------------------------------------------------------------------------------------|
| Signal to background ratio | $S: B = \frac{\mu_p}{\mu_n}$                                                              | Measures the sensitivity of the assay for signal detection; normally calculated using controls.                                                | >2-fold                                                                                                                                                                      |
| Coefficient of variation   | $\%CV = \frac{\sigma}{\mu} \times 100$                                                    | Represents intra-assay precision or repeatability.                                                                                             | <15%                                                                                                                                                                         |
| SSMD*                      | $\hat{\beta} = \frac{\bar{X}_p - \bar{X}_n}{1.4826 \sqrt{(\bar{s}_p)^2 + (\bar{s}_n)^2}}$ | Proposed as a preferred measure of HTS assay quality due to its robustness                                                                     | $\hat{\beta} \geq 2$ : excellent quality<br>$2 > \hat{\beta} \geq 1$ : good quality<br>$1 > \hat{\beta} \geq 0.5$ : acceptable quality<br>$\hat{\beta} < 0.5$ : poor quality |
| Z' factor                  | $Z' = 1 - \frac{(3\sigma_p + 3\sigma_n)}{ \mu_p - \mu_n }$                                | An accepted, more stringent measure of HTS assay quality. Z' is used in the absence of library compounds to optimize an assay prior to screen. | > 0.5: excellent quality<br>0 to 0.5: acceptable quality<br>= 0: for "yes/no" type of assay<br>< 0: should be improved                                                       |

"p" and "n" correspond to the values of positive and negative controls respectively.  $\mu$ : mean;  $\sigma$ : standard deviation; SSMD\*: robust SSMD (strictly standardized mean difference);  $\bar{X}$ : sample median;  $\bar{s}$ : sample median absolute deviation. (Described in detail in Inglese et al., 2007; White et al., 2016; and Zhang, 2008, 2011).

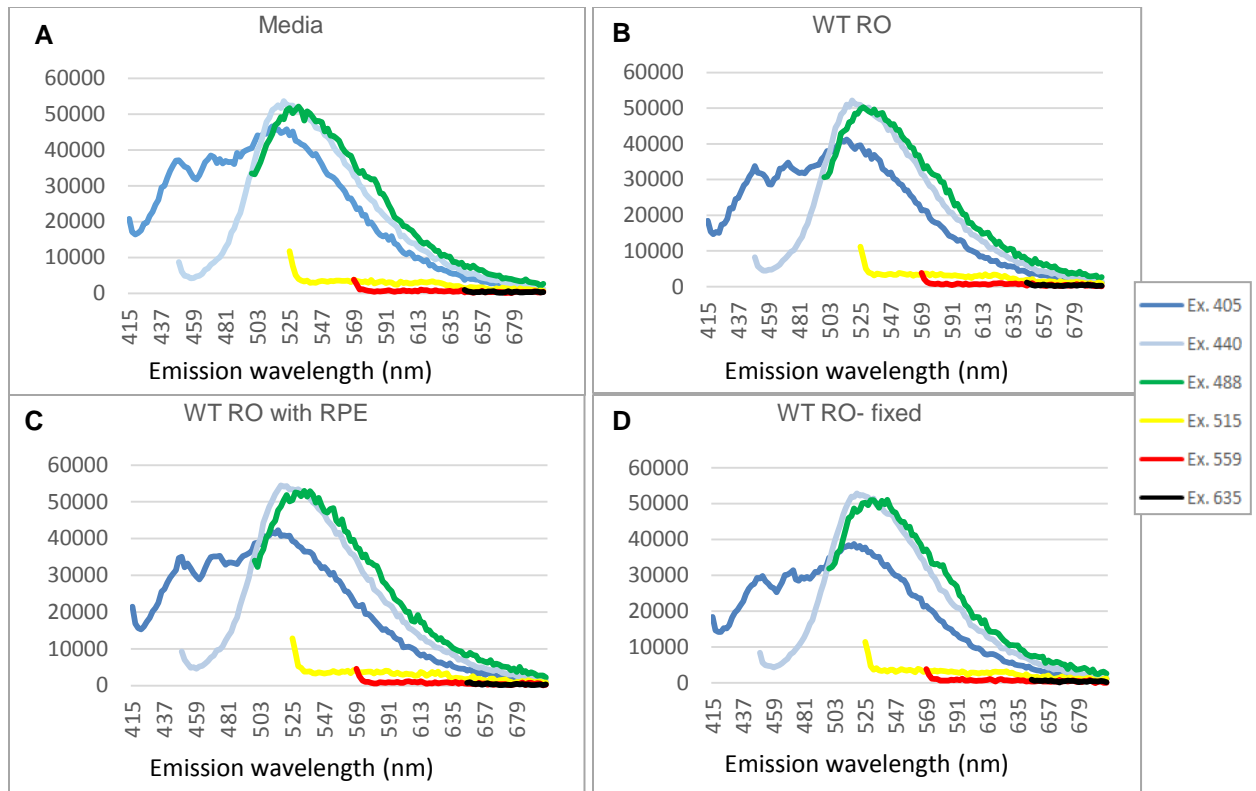

**Figure S1. Background fluorescence profiles.** (A-D) Graphs show fluorescence emission profiles for common excitation wavelengths (see inset). Fluorescence intensity scans were performed on clear media (A); live, not labeled, wild type retinal organoids (RO, B); retinal organoids with small amounts of RPE attached to the tip (C); and retinal organoids fixed with 4% paraformaldehyde for 10 minutes (D). Curves represent average fluorescence profiles of 5 independent ROs per condition.

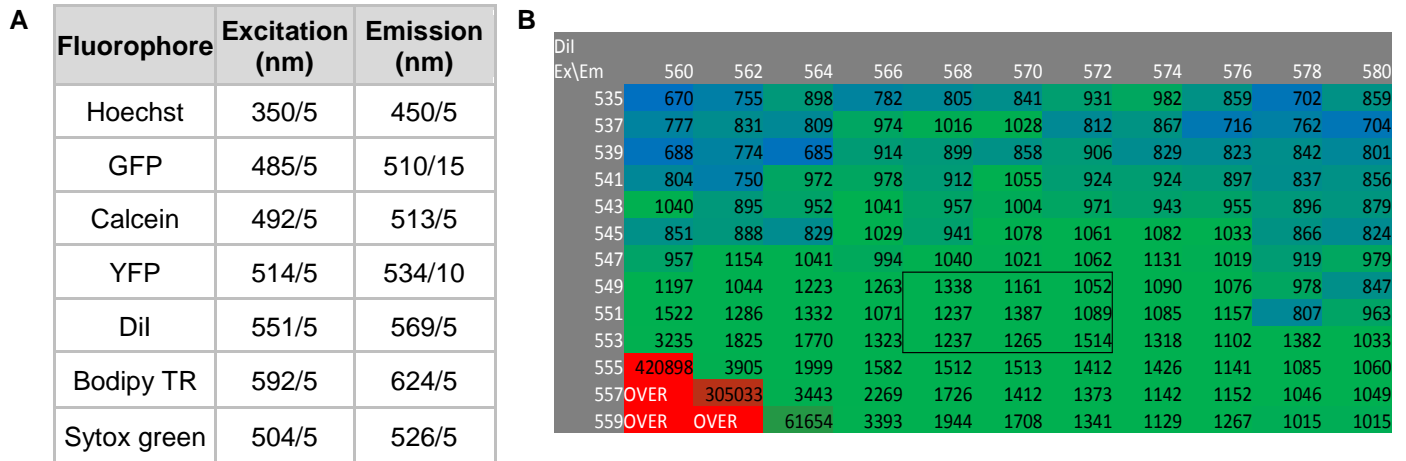

**Figure S2. Optimized excitation and emission wavelengths.** (A) Table shows the optimal excitation and emission wavelengths identified by performing 3D fluorescence scans (i.e. scans spanning a range of excitation and emission wavelengths) on transgenic retinal organoids (GFP and YFP), or retinal organoids stained with different fluorescent dyes (Hoechst, calcein, Dil, Bodipy TR, Sytox green). Live organoids were used for this experiment, with the exception of Sytox green, which was used on fixed organoids. Results are expressed as "wavelength/bandwidth". (B) Example of a 3D scan performed for one of the conditions (Dil staining). Heat map is a visual representation used to aid in the determination of optimal parameters. Lowest wavelength values (blue) provide decreased sensitivity, whereas highest values (red) constitute an artifact from the overlap of the excitation and emission spectral curves. Box illustrates the wavelengths that were chosen for their sensitivity performance among the mid ranges of the matrix (green color set at the 50th percentile).

## SUPPLEMENTARY METHODS

### Generation of transgenic hiPSC lines

The human episomal CB-iPSC6.2 line (A18945, ThermoFisher Scientific; Burrige et al., 2011) was maintained on Matrigel (growth-factor-reduced; BD Biosciences)-coated plates with mTeSR1 medium (Stemcell Technologies). Transgenic cell lines were generated by electroporation with the Neon Transfection System (Invitrogen) according to manufacturer instructions as described in Ranganathan et al., 2014. The following plasmid DNAs were used: i) CRISPR/Cas9-mediated constitutively expressed GFP hiPSC line: 1 µg of AAV-CAGGS-EGFP donor vector (Addgene # 22212, gift from Rudolf Jaenisch; Hockemeyer et al., 2009); 0.6 µg of pCas9\_GFP (Addgene # 44719, gift from Kiran Musunuru); and 0.3 µg of gRNA\_AAVS1-T2 (Addgene # 41818, gift from George Church; Mali et al., 2013); ii) PiggyBac transposon-mediated constitutively expressed membrane YFP hiPSC line: 1 µg of PB-myr-tagged YFP donor vector and 0.3 µg of PB-HA transposase expression vector (Wellcome Trust Sanger Institute; Cadiñanos et al., 2007).

Briefly, cells were pre-treated with 5 µM blebbistatin for 24h to increase cell viability, followed by treatment with Accutase (Stemcell Technologies) for 5min, dissociation into single cells, centrifugation at 80 x g for 5 min. for pellet formation and incubation on ice for 15 min. The corresponding plasmids for each transgenic cell line were combined in R buffer, resuspended in the plasmid cocktail and electroporated with a 10 µl tip-type and the following parameters: 1,300 V; 20 ms pulse length; 1 pulse. Cells were then gently resuspended into 1ml of mTeSR1 plus 5µM blebbistatin, incubated at room temperature for 20 min and plated onto Matrigel-coated 35mm TC treated dishes containing mTeSR1 and 5 µM blebbistatin. Finally, cells were incubated at room temperature for 20 min and cultured thereafter in 37 C and 5% CO<sub>2</sub>. After 5 days, stable clonal sublines were manually selected with a Leica MZ-16F fluorescence stereomicroscope.

### Media and dye solutions for staining of retinal organoids

Fluorescent staining and scanning of retinal organoids was performed in clear retinal differentiation medium (cRDM) containing 60% DMEM/F12 no phenol red (cat# 21041-025), and 40% FluoroBrite DMEM (cat# A18967-01), supplemented with 1x B27 (cat# 12587-010), 0.4x Glutamax (cat# 35050-079), 1x MEM-Non essential amino acids (cat# 11140-050), and 1x antibiotic-antimycotic (cat# 15240-062), all from Thermo Fisher Scientific. Solutions of the corresponding dyes were prepared in cRDM as follows: Hoechst 33342 (cat# H3570), 2.5 µl/ml; Calcein AM 4mM stock solution in DMSO (cat# C34852), 2.75 µl/ml ; Vybrant CM-Dil (cat# V-22888), 5 µl/ml; and Bodipy TR (cat# C34556), 20 µl/ml; Sytox green 5 mM (cat# S7020), 2 µl/ml (all from Thermo Fisher Scientific). Staining was performed as described in Methods. Long-term suspension culture media for aged retinal organoids consists of DMEM/F12 -Glutamax (cat#10565018, ThermoFisher Scientific) supplemented with 1% N2 (cat# 17502048, ThermoFisher Scientific), 1x MEM-Non essential amino acids, 1% antibiotic-antimycotic, 100 µM Taurine (cat# T0625, Sigma-Aldrich), and 10% fetal bovine serum (cat# S11150, Atlanta Biologicals), as described in Zhong et al., 2014.

### Whole-mount immunofluorescence

Retinal organoids were fixed in 4% paraformaldehyde for 10 min and rinsed 3X in PBS, followed by 3X 20 min washes in PBST (0.25% Triton X-100 in PBS) with rocking.

For Otx2 immunofluorescence organoids were blocked in 10% NGS (normal goat serum), 0.25% PBST, overnight at room temperature. They were then washed 3X 30 min in 0.25% PBST, and 3X 30 min in PBS, followed by incubation in rabbit-anti-Otx2 antibody (cat# AB9566; ThermoFisher Scientific) diluted 1/500 in 2% NGS, 0.25% PBST for 2 days at room temp with rocking. Subsequently, organoids were rinsed 3X 30 min in 0.25% PBST, and 3X 30 min in PBS, followed by incubation with secondary antibody: goat-anti-mouse Alexafluor 514 (cat# A-31558; ThermoFisher Scientific) , diluted 1/500, in 2%NGS, 0.25% PBST, for 2 days at room temp with rocking. Finally, they were washed 3X 30 min in

0.25% PBST, and 3X 30 min in PBS. For size normalization organoids were counterstained by incubation with Bodipy TR, 20  $\mu$ l/ml at 37°C for 90 min, followed by 3 washes in cRDM, and plated in black v-bottom 96-well plates for scanning.

For Pou4f2 immunofluorescence organoids were blocked in 10% NDS (normal donkey serum), 0.25% PBST, overnight at 4°C. They were then washed 3X 30 min in 0.25% PBST, and 3X 30 min in PBS, followed by incubation in goat-anti-Brn3b(Pou4f2) antibody (Santa Cruz Biotechnologies, cat# SC-6026x) diluted 1/1000 in 2% NDS, 0.25% PBST for 3 days at 4°C with rocking. Subsequently, organoids were rinsed 3X 30 min in 0.25% PBST, and 3X 30 min in PBS, followed by incubation with secondary antibody: donkey-anti-goat-Alexafluor 546 (ThermoFisher Scientific, cat# A-11056), diluted 1/500, in 2%NDS, 0.25% PBST, for 3 days at 4°C with rocking. Finally, they were washed 3X 30 min in 0.25% PBST, and 3X 30 min in PBS. For size normalization organoids were counterstained by incubation with Sytox green, 10  $\mu$ M at 37°C for 90 min, followed by 3 washes in cRDM, and plated in black v-bottom 96-well plates for scanning.

### **Immunofluorescence on cryosections**

Retinal organoids were fixed in 4% paraformaldehyde for 10 min and rinsed 3X in PBS, followed by sucrose gradient and embedding in a 1:1 mixture of 25% sucrose:OCT. 12  $\mu$ m thick sections were obtained using a cryostat, and slides were incubated at room temperature for 60 minutes, followed by PBS wash and blocking in 10% NGS, 0.25% PBST for 1 hour. Slides were then incubated overnight at 4°C in anti-recoverin antibody (cat# AB5585, Millipore- ThermoFisher Scientific) diluted 1/500 in 2% NGS, 0.25% PBST. After 3X 10 min. washes in PBS, slides were incubated in secondary antibody: goat-anti-rabbit Alexafluor 546 (cat# A-11035; ThermoFisher Scientific), diluted 1/500, in 2%NGS, 0.25% PBST, for 2 hrs. at room temp. Finally, they were washed 3X 10 min in PBS and incubated for 5 min. in DAPI (cat# D1306; ThermoFisher Scientific) for nuclear counterstaining. Imaging was performed using a Zeiss LSM 510 confocal microscope.

### Eqn. S1. Size normalization

$$\text{Norm. } X_a = \frac{X_a * \bar{Y}}{Y_a}$$

*Norm. X<sub>a</sub>*: Normalized fluorescence intensity value of fluorophore X for organoid a.

*X<sub>a</sub>*: Fluorescence intensity value of fluorophore X for organoid a.

*Y<sub>a</sub>*: Fluorescence intensity value of global fluorophore Y (normalizer) for organoid a.

$\bar{Y}$ : Mean of fluorescence intensity values for fluorophore Y.

### SUPPLEMENTARY REFERENCES

Hockemeyer, D., Soldner, F., Beard, C., Gao, Q., Mitalipova, M., Dekelver, R.C., Katibah, G.E., Amora, R., Boydston, E.A., Zeitler, B., Meng, X., Miller, J.C., Zhang, L., Rebar, E.J., Gregory, P.D., Urnov, F.D., Jaenisch, R. (2009). Efficient targeting of expressed and silent genes in human ESCs and iPSCs using zinc-finger nucleases. *Nat. Biotechnol.* **27**, 851-7.

Mali, P., Yang, L., Esvelt, K.M., Aach, J., Guell, M., Dicarlo, J.E., Norville, J.E., Church, G.M. (2013). RNA-Guided Human Genome Engineering via Cas9. *Science* **339**, 823-6.

Ranganathan, V., Wahlin, K., Maruotti, J., Zack, D.J. (2014). Expansion of the CRISPR–Cas9 genome targeting space through the use of H1 promoter-expressed guide RNAs. *Nat. Commun.* **5**, 4516.

Cadiñanos, J. and Bradley, A. (2007). Generation of an inducible and optimized *piggyBac* transposon system. *Nucleic Acids Res.* **35**, e87.
